# Supplementary material
Source: Springer Nature journal article supplement (https://www.springermedizin.de/resource/supplementary/12889_2007_1175_MOESM11_ESM.pdf/9502618)

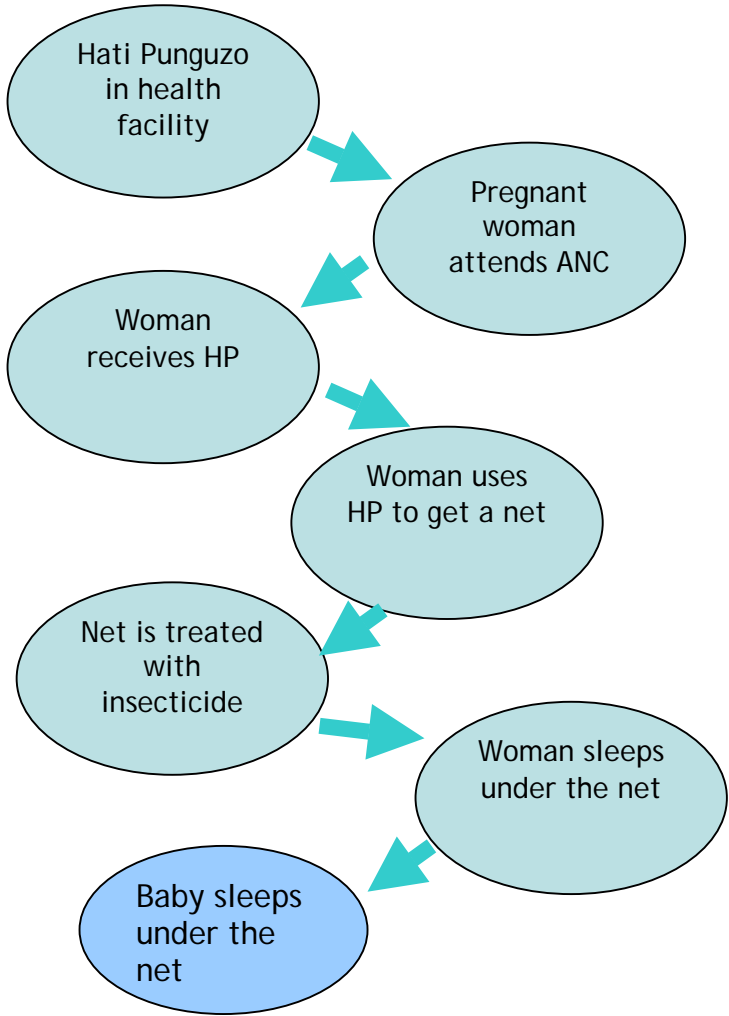

Intermediate processes involved in achieving programme outcome

Supplement: MOESM11 [file 9502618]
